# Supplementary material
Source: Royal Society of Chemistry journal article supplement (doi:10.1039/d6py00412a)
Supplement: d6py00412a1.pdf [file d6py00412a1.pdf]

## Supporting Information for

### Thermoresponsive Alternating Copolymers with Tunable UCST Behavior in Aqueous Medium

Arya Karangat, Sreya Gain, Puja Poddar, Arnab Banerjee,\* Priyadarsi De\*

Polymer Research Centre and Centre for Advanced Functional Materials, Department of Chemical Sciences, Indian Institute of Science Education and Research Kolkata, Mohanpur - 741246, West Bengal, India.

\*Corresponding Authors: E-mails: ab18ip007@iiserkol.ac.in (AB); p\_de@iiserkol.ac.in (PD)

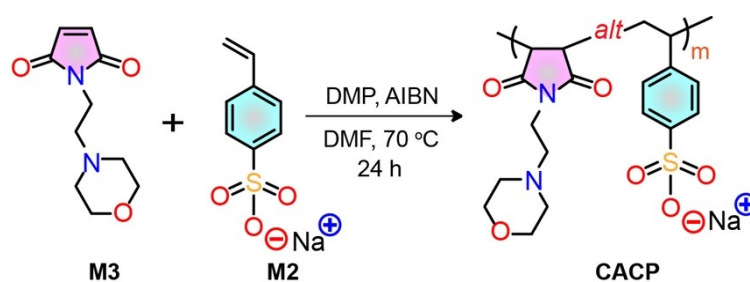

**Scheme S1.** Scheme for the synthesis of CACP control polymer.

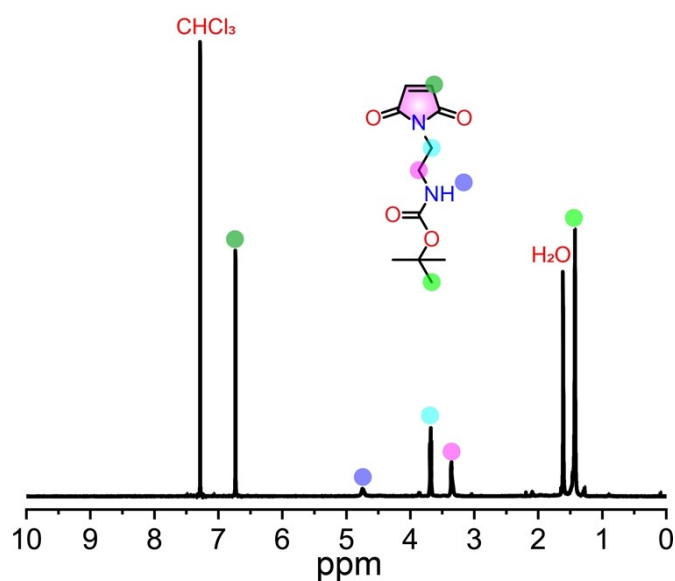

**Fig. S1**  $^1\text{H}$  NMR spectrum of M1 in  $\text{CDCl}_3$ .

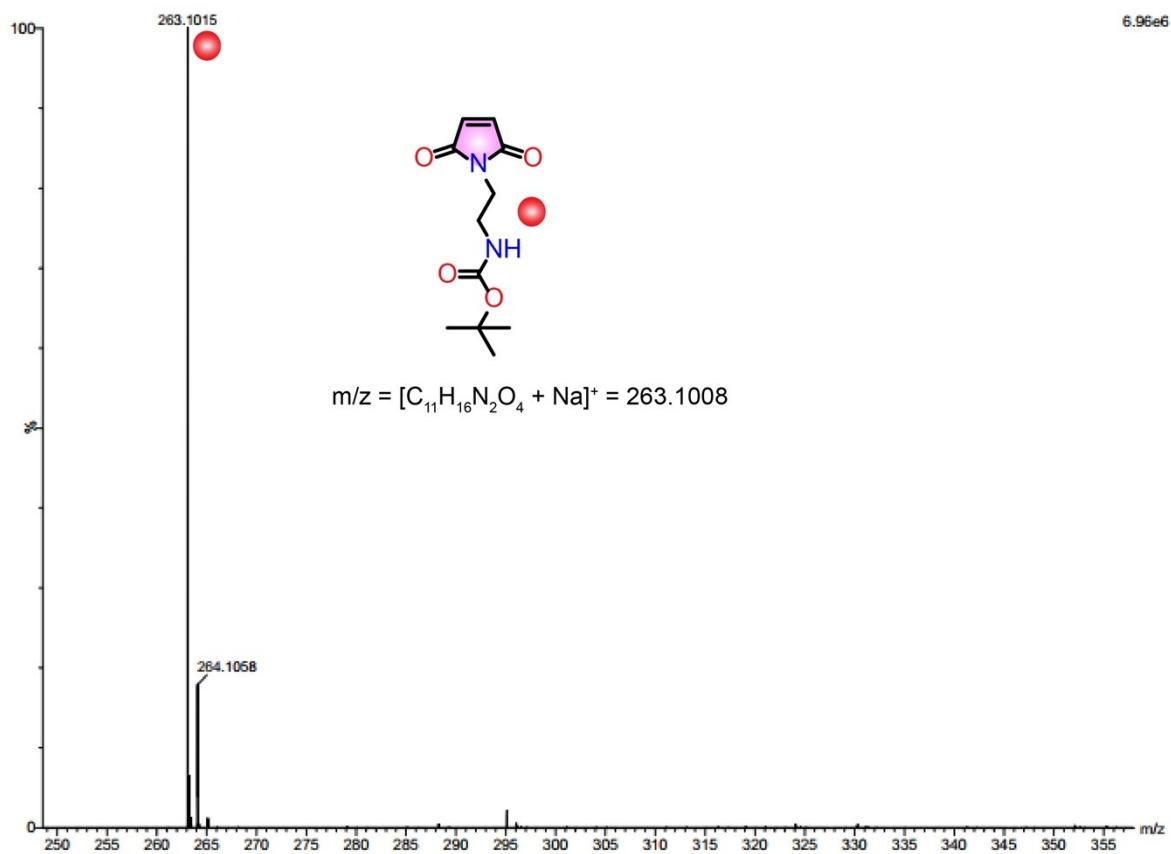

**Fig. S2** HRMS spectrum of **M1** in methanol.

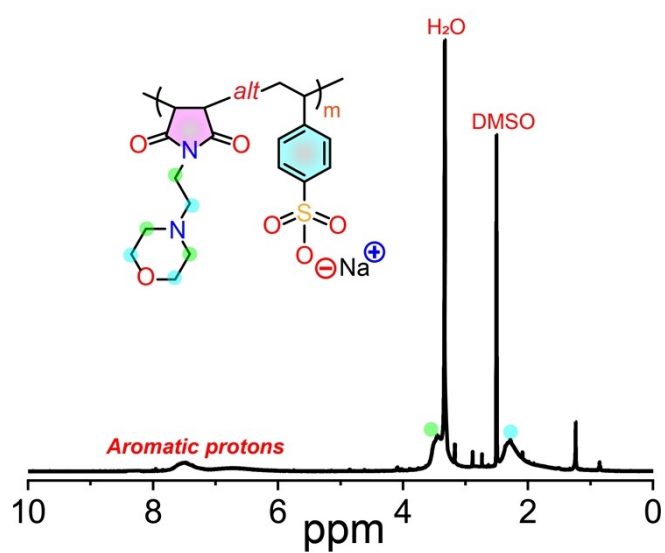

**Fig. S3** <sup>1</sup>H NMR spectrum of **CACP** in DMSO-*d*<sub>6</sub>.

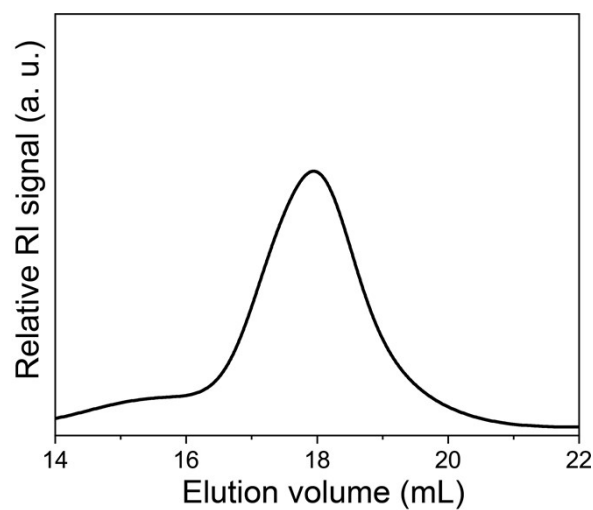

**Fig. S4** SEC RI trace of CACP.

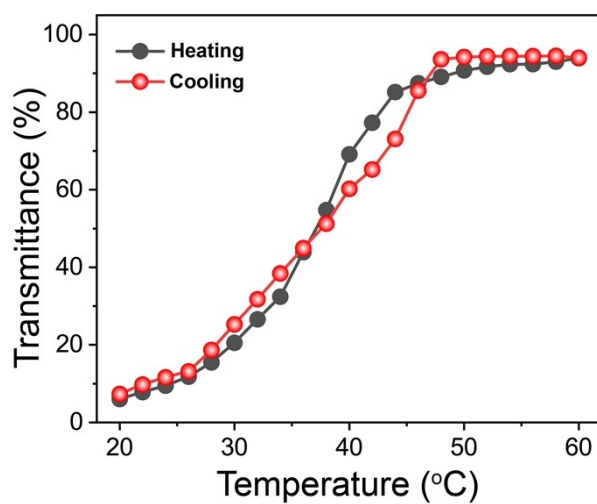

**Fig. S5** Heating and cooling curves of ACP2 solution (0.4 wt%) at pH 7.4.

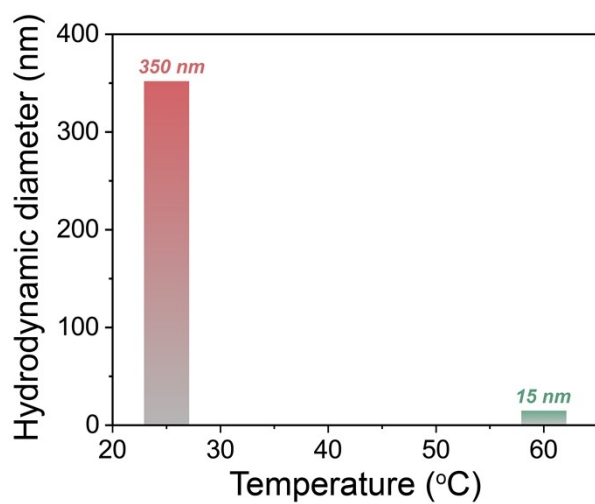

**Fig. S6** Size of particles in ACP2 solution (0.1 mg/ mL) in water under heating and cooling conditions.

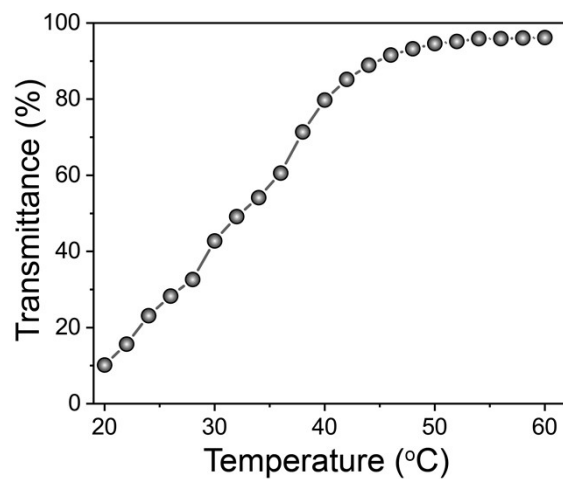

**Fig. S7** Temperature-dependent transmittance changes of **ACP1** (0.4 wt%) solution in PBS buffer.

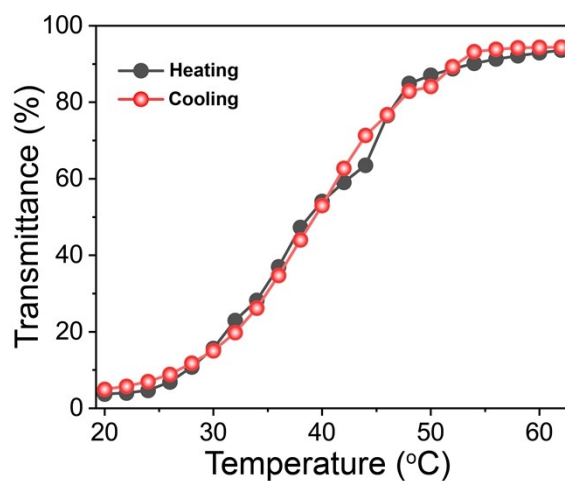

**Fig. S8** Heating and cooling curves of **CACP** solution (0.2 wt%) at pH 3.

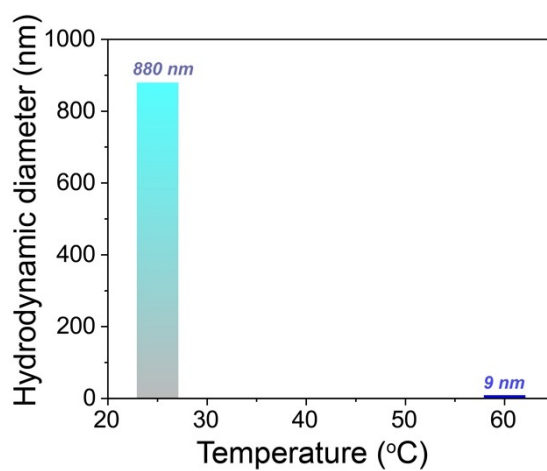

**Fig. S9** Size of particles in **CACP** solution (1 mg/ mL) in water under heating and cooling conditions.

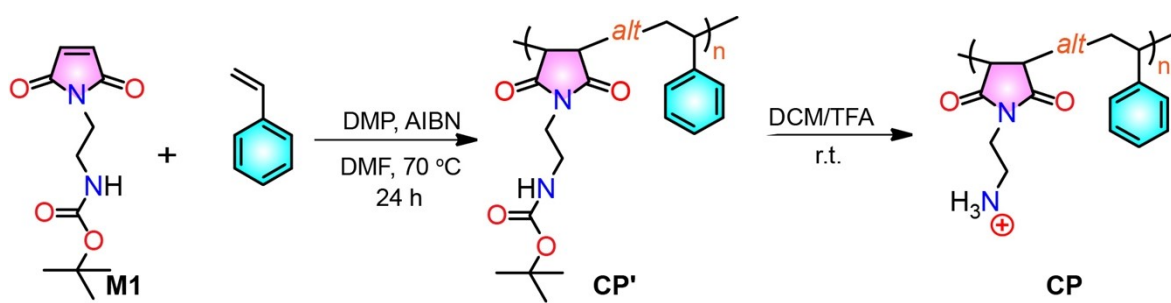

**Scheme S2.** Scheme for the synthesis of **CP** control polymer.

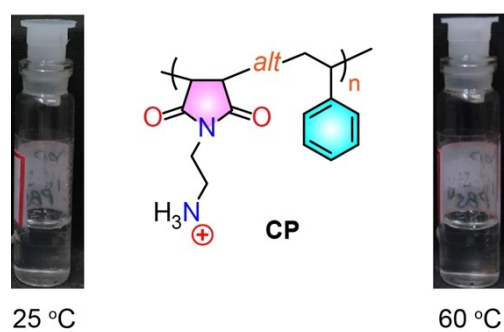

**Fig. S10** Temperature-responsive of **CP** (0.5 wt%) solution in PBS buffer.
